# Supplementary material for: Protective effect of <i>Vigna unguiculata</i> extract against aging and neurodegeneration
Source: publisher site journal article supplement (doi:10.18632/aging.104069), 2020-10-05
Supplement: Supplementary file [file aging-v12i19-104069-supplementary-material-SD1.pdf]

**SUPPLEMENTARY FIGURES**

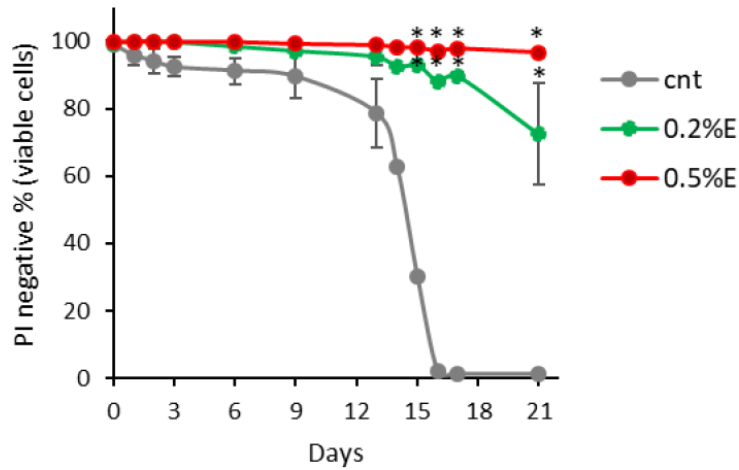

**Supplementary Figure 1. The effect of cowpea extract is synergistic with caloric restriction.** CLS of yeast wt cells grown in SD medium containing 0.5% glucose in the absence or presence of 0.2% or 0.5% extract of *Vigna unguiculata*. \*p<0.05 relative to control cells.

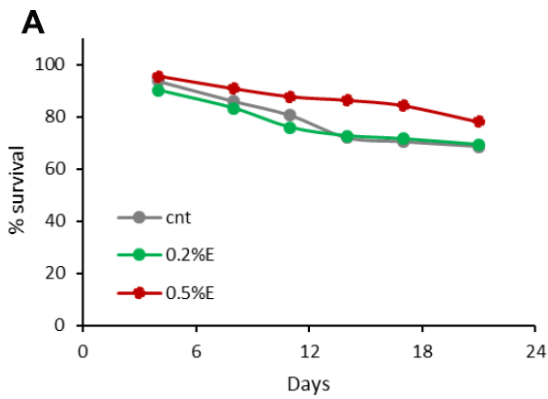

**B**

| Condition                    | P-value |
|------------------------------|---------|
| CTRL_F v.s. 0.5% bean_F      | 0.0032  |
| CTRL_F v.s. 0.2% bean_F      | 0.9985  |
| 0.5% bean_F v.s. 0.2% bean_F | 0.0032  |

**Supplementary Figure 2. Survivorship of adult female *D. melanogaster*.** (A) Flies have been supplemented with 0.2 and 0.5% cowpea extract lifelong. Data are presented as percentage survival of flies as function of time (in days). (B) Analysis of the survivorship data with log-rank test using the online application for the survival analysis of life-span assays OASIS.

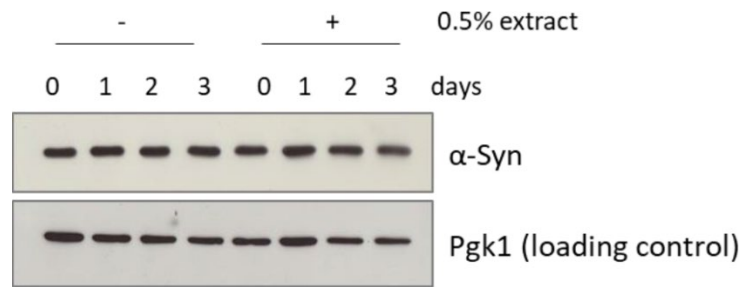

**Supplementary Figure 3.  $\alpha$ -synuclein level is unchanged but it is differently localized in the presence of cowpea extract in yeast cells.** Western blot analysis is using anti-synuclein antibody in wt [pYX242-SNCA] cells after 5h, 1 day, 2 days, 3 days treatment with 0.5% *V. unguiculata* extract. Pgk1 was used as loading control.

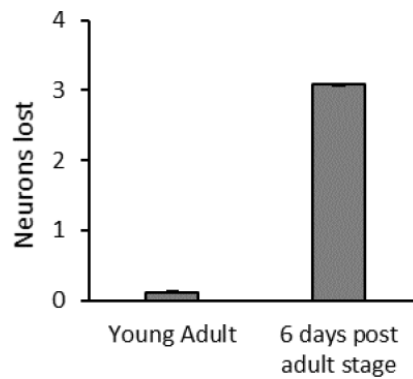

**Supplementary Figure 4.  $\alpha$ -synuclein causes age-related dopaminergic neurons lost in *C. elegans*.** Number of nonvisible CEP dopaminergic neurons in human  $\alpha$ -synuclein expressing strain. In a wild type strain four CEP neurons expressing DsRed are always visible (not shown). In young adults almost no neurodegeneration is visible, while 6 days after adult stage a mean of 3 neurons is lost ( $p < 0.0001$  Mann-Whitney non parametric test). Error bars represent the SEM for two independent experiments. The number of young adult animals scored is 100, while after 6 days post adult stage is 91.

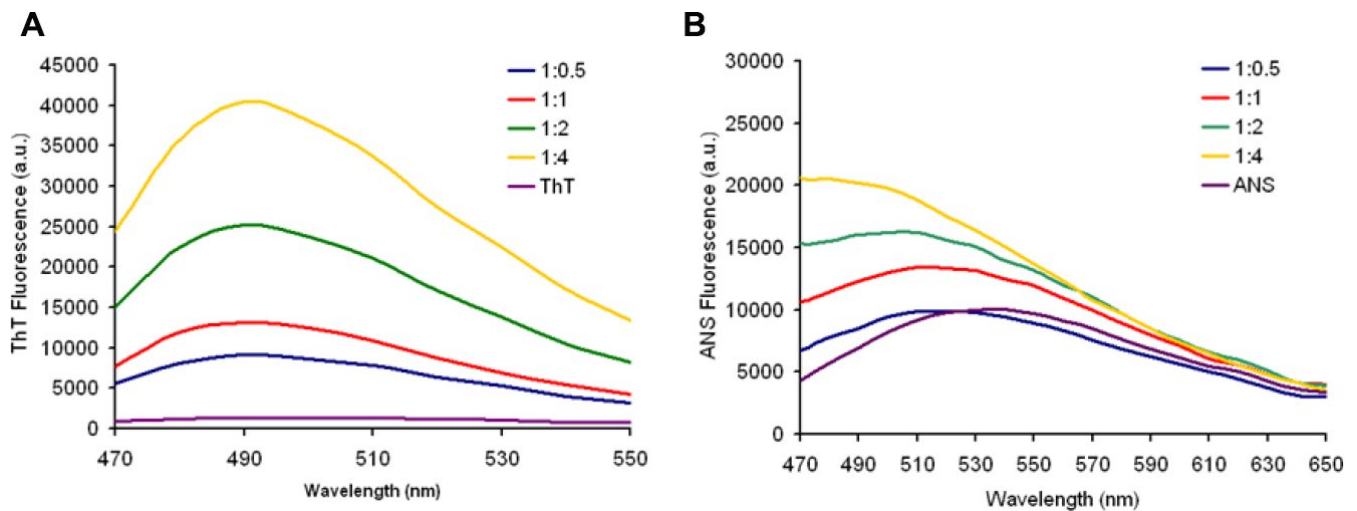

**Supplementary Figure 5. Extract interferences on ThT and ANS fluorescence.**
